# Supplementary material
Source: publisher site journal article supplement (https://www.dovepress.com/get_supplementary_file.php?f=336310.docx)
Supplement: Supplementary file 1 [file get_supplementary_file.php]

| Table S1. GO and KEGG pathway enrichment analysis of module genes in postmenopausal osteoporosis samples. | | | |
| --- | --- | --- | --- |
| Term | Description | Count in gene set | P-Value |
| GO:0008380 | RNA splicing | 16 | 1.27E-06 |
| GO:0006397 | mRNA processing | 15 | 2.57E-05 |
| GO:0016071 | mRNA metabolic process | 16 | 3.07E-05 |
| GO:0006396 | RNA processing | 19 | 7.65E-05 |
| GO:0006414 | translational elongation | 8 | 1.85E-04 |
| GO:0000398 | nuclear mRNA splicing, via spliceosome | 9 | 4.48E-04 |
| GO:0010608 | posttranscriptional regulation of gene expression | 10 | 8.72E-04 |
| GO:0051028 | mRNA transport | 6 | 0.003587 |
| GO:0030529 | ribonucleoprotein complex | 19 | 2.26E-06 |
| GO:0031981 | nuclear lumen | 33 | 5.46E-06 |
| GO:0003723 | RNA binding | 28 | 1.39E-08 |
| GO:0000166 | nucleotide binding | 39 | 0.00299 |
| hsa03010 | Ribosome | 7 | 9.12E-04 |
| hsa04910 | Insulin signaling pathway | 7 | 0.008291 |
| hsa03040 | Spliceosome | 6 | 0.024503 |
| hsa04722 | Neurotrophin signaling pathway | 5 | 0.079841 |
| hsa04120 | Ubiquitin mediated proteolysis | 5 | 0.105574 |
| hsa04330 | Notch signaling pathway | 3 | 0.12682 |
| hsa04666 | Fc gamma R-mediated phagocytosis | 4 | 0.129174 |
| hsa03018 | RNA degradation | 3 | 0.172598 |
| hsa04142 | Lysosome | 4 | 0.19946 |
| hsa04210 | Apoptosis | 3 | 0.318653 |
| GO: Gene Ontology; KEGG: Kyoto Encyclopedia of Genes and Genomes. | | | |
